# Supplementary material for: The evolution of multi-gene families and metabolic pathways in the evening primroses (Oenothera: Onagraceae): A comparative transcriptomics approach
Source: PLoS One. 2022 Jun 24;17(6):e0269307. doi: 10.1371/journal.pone.0269307 (PMC9231714; doi:10.1371/journal.pone.0269307)
Supplement: S3 Table — (XLSX) [file pone.0269307.s006.xlsx]

## Sheet: Table S3
Table S3. Annotation statistics of blasted annotated genes based on the longest isoform from 63 Oenothera individuals. Asterisks depict those 30 samples that were used in subsequent comparative analyses
#	1kp sample code	Species	Biological replicate	No. Transcripts (longest isoform)	TransDecoder proteins	Blastx Hits	%Blastx Hits	PFAM Hits	SignalP Annotations	TMHMM Annotations	EggNOG Annotations	KEGG Annotations	GO Annotations
1	GVCB	Oenothera affinis*	1-S (single replicate per species)	35760	23350	29544	82.6174	21559	1564	5005	25947	26999	29696
2	OEAR	Oenothera argillicola*	1-S	41526	21965	30731	74.0042	19081	1409	4498	24267	25502	30762
3	DSVQ	Oenothera biennis	1	30578	21365	27049	88.459	20290	1493	4785	23787	24771	27285
4	DWAP	Oenothera biennis	2	34316	22432	29026	84.5845	21323	1506	4817	25522	26510	29246
5	EXGW	Oenothera biennis*	3	37987	22841	32639	85.9215	23753	1707	5660	28527	29824	32857
6	FDBS	Oenothera biennis	4	34498	22154	28277	81.9671	20772	1606	4913	24753	25800	28474
7	MLUJ	Oenothera biennis	5	36764	23436	32532	88.4887	24159	1798	5700	28454	29733	32810
8	EQYT	Oenothera capillifolia ssp. berlandieri *	1-S	35385	22821	33555	94.8283	25209	1873	6182	29214	30542	33900
9	KBRW	Oenothera clelandii*	1-S	32508	20738	25343	77.9593	17975	1253	3946	22305	23145	25494
10	OEEE	Oenothera elata ssp. elata*	1-S	36719	20972	24830	67.6217	16925	1184	3871	21356	22166	24950
11	OEHI	Oenothera elata ssp. hirsutissima*	1-S	49655	23369	36815	74.1416	20355	1343	4661	28319	29723	36907
12	AJBK	Oenothera elata ssp. hookeri*	1	40026	25049	35156	87.8329	24991	1921	6182	30836	32103	35371
13	IDAU	Oenothera elata ssp. hookeri	2	34206	22154	29215	85.409	21766	1686	5288	25654	26701	29474
14	ROLB	Oenothera elata ssp. hookeri	3	45298	28379	42451	93.715	31389	2995	8385	36807	38474	42782
15	ECSL	Oenothera filiformis	1	31648	21480	26241	82.9152	19360	1434	4577	22987	23988	26437
16	JYOB	Oenothera filiformis*	2	32396	21873	28640	88.406	21822	1757	5292	24886	26005	28891
17	NQWS	Oenothera filiformis	3	33630	22622	33033	98.2248	25597	1773	5905	30364	31738	35360
18	IIFB	Oenothera gaura	1	34120	22759	29182	85.5275	21676	1561	4996	25517	26670	29395
19	JMJV	Oenothera gaura*	2	36256	23156	30476	84.0578	22464	1759	5463	26719	27847	30778
20	LACT	Oenothera gaura	3	33948	22425	28228	83.1507	20756	1497	4795	24781	25831	28475
21	LHDP	Oenothera gaura	4	33560	22450	28162	83.9154	20753	1492	4764	24606	25685	28375
22	TGOP	Oenothera gaura	5	36203	23806	35208	97.2516	26666	1928	6232	31934	33299	36787
23	OEGL	Oenothera glazioviana*	1-S	48981	24283	37397	76.35	23132	1769	5551	29411	30988	37546
24	EBPG	Oenothera grandiflora	1	33172	22890	27604	83.2148	20800	1596	5077	24344	25353	27860
25	GZUR	Oenothera grandiflora	2	34714	22160	28560	82.2723	20580	1379	4719	25103	26157	28763
26	HOOU	Oenothera grandiflora	3	36846	23994	30813	83.6264	22327	1660	5164	27000	28190	31083
27	MJHP	Oenothera grandiflora*	4	34468	22761	27959	81.1158	20587	1459	4802	24525	25515	28135
28	REZJ	Oenothera grandiflora	5	33864	22696	29405	86.8326	22113	1696	5461	25780	26886	29723
29	CHTD	Oenothera grandis	1	36697	22871	30007	81.7696	21642	1617	4996	26123	27107	30314
30	EWHG	Oenothera grandis	2	35781	21976	29930	83.6477	21134	1610	4952	26296	27311	30186
31	SEMK	Oenothera grandis*	3	33587	22787	29833	88.8231	22777	1690	5413	26124	27226	30078
32	TAHF	Oenothera grandis	4	33303	21867	28542	85.704	21046	1593	4819	25046	26009	28794
33	WPUV	Oenothera grandis	5	35810	22695	30432	84.9818	21865	1797	5244	26714	27676	30682
34	OEJA	Oenothera jamesii*	1-S	45670	23353	33047	72.3604	20974	1626	5109	26334	27708	33208
35	AQXA	Oenothera laciniata ssp. laciniata	1-S	33774	21608	27350	80.9795	19159	1454	4330	24064	24927	27595
36	ICUS	Oenothera laciniata*	1	35241	22959	32705	92.8038	24558	1815	5835	28358	29576	32939
37	ONZG	Oenothera laciniata	2	36241	22515	31220	86.1455	22082	1782	5373	27323	28307	31478
38	QBRF	Oenothera laciniata	3	34837	22229	30026	86.19	21823	1698	5120	26285	27371	30218
39	DIBI	Oenothera laciniata	4	40114	24068	32279	80.4682	21679	1849	5125	27888	29047	32519
40	OELA	Oenothera longissima*	1-S	43679	22497	32450	74.292	20545	1547	4799	26030	27411	32554
41	HPNZ	Oenothera longituba*	1-S	35220	22366	26823	76.1584	18948	1521	4616	23749	24628	27072
42	CJGZ	Oenothera nana*	1-S	37990	23303	29889	78.676	20931	1576	4745	26352	27366	30070
43	OENU	Oenothera nutans*	1-S	44876	23174	34815	77.5804	23651	1727	5527	28809	30300	34975
44	OEOA	Oenothera oakesiana*	1-S	46276	23632	35551	76.8238	23789	1706	5491	29183	30663	35763
45	OEPA	Oenothera parviflora*	1-S	44126	23597	34906	79.1053	23467	1868	5492	28145	29733	35086
46	DZLN	Oenothera picensis*	1-S	36943	22397	31201	84.4571	22016	1530	5099	26969	28138	31367
47	YHLF	Oenothera rhombipetala*	1-S	34262	21145	27205	79.4028	18533	1403	4354	24056	24894	27347
48	FXJC	Oenothera rosea	1	33662	22721	29716	88.2776	22851	1785	5469	25985	27058	30006
49	KFAL	Oenothera rosea	2	35479	22562	27264	76.8455	19624	1594	4757	23881	24847	27467
50	XSNO	Oenothera rosea	3	37331	22350	29488	78.9907	20822	1714	5082	25907	26910	29739
51	YIVZ	Oenothera rosea	4	42949	24682	41280	96.114	31364	2508	7716	37303	38832	43627
52	SJAN	Oenothera serrulata	1-S	36775	23071	31539	85.7621	22118	1713	5181	27269	28565	31790
53	GBGW	Oenothera speciosa	1	33702	19422	32988	97.8814	22854	1742	5395	29542	30622	34295
54	RLZU	Oenothera speciosa	2	37280	22952	32230	86.4539	22877	1630	5073	27945	28931	32406
55	UASK	Oenothera speciosa	3	39691	23671	36285	91.4187	25026	1756	5449	31395	32592	36515
56	XZAQ	Oenothera speciosa	4	39727	23407	37839	95.2476	26819	1882	5874	32753	34145	38096
57	XZPP	Oenothera speciosa	5	39595	23396	38003	95.9793	28516	2032	6427	33929	35416	39540
58	OEST	Oenothera stucchii	1-S	38073	21309	27628	72.5659	17907	1260	4103	23006	24068	27789
59	JKNQ	Oenothera suffulta ssp. suffulta*	1-S	34736	22676	31771	91.4642	23192	1682	5388	27803	29044	32007
60	HKMQ	Oenothera villaricae*	1-S	36276	20849	29183	80.4471	18998	1310	4208	25656	26646	29387
61	OEVS	Oenothera villosa ssp. strigosa*	1-S	42584	23403	31978	75.0939	22139	1789	5276	26072	27463	32132
62	OEVV	Oenothera villosa ssp. villosa	1-S	22547	13291	13752	60.9926	8526	1417	1866	12555	12942	13824
63	OEWO	Oenothera wolfii*	1-S	43724	22993	32469	74.259	21586	1663	5015	26460	27779	32613
